# Supplementary material for: An application of partial least squares for identifying dietary patterns in bone health
Source: Springer Nature journal article supplement (doi:10.1007/s11657-017-0355-y), 2017-07-12

Supplementary Figure 1. Factor loadings for dietary patterns 1, 3, and 5.

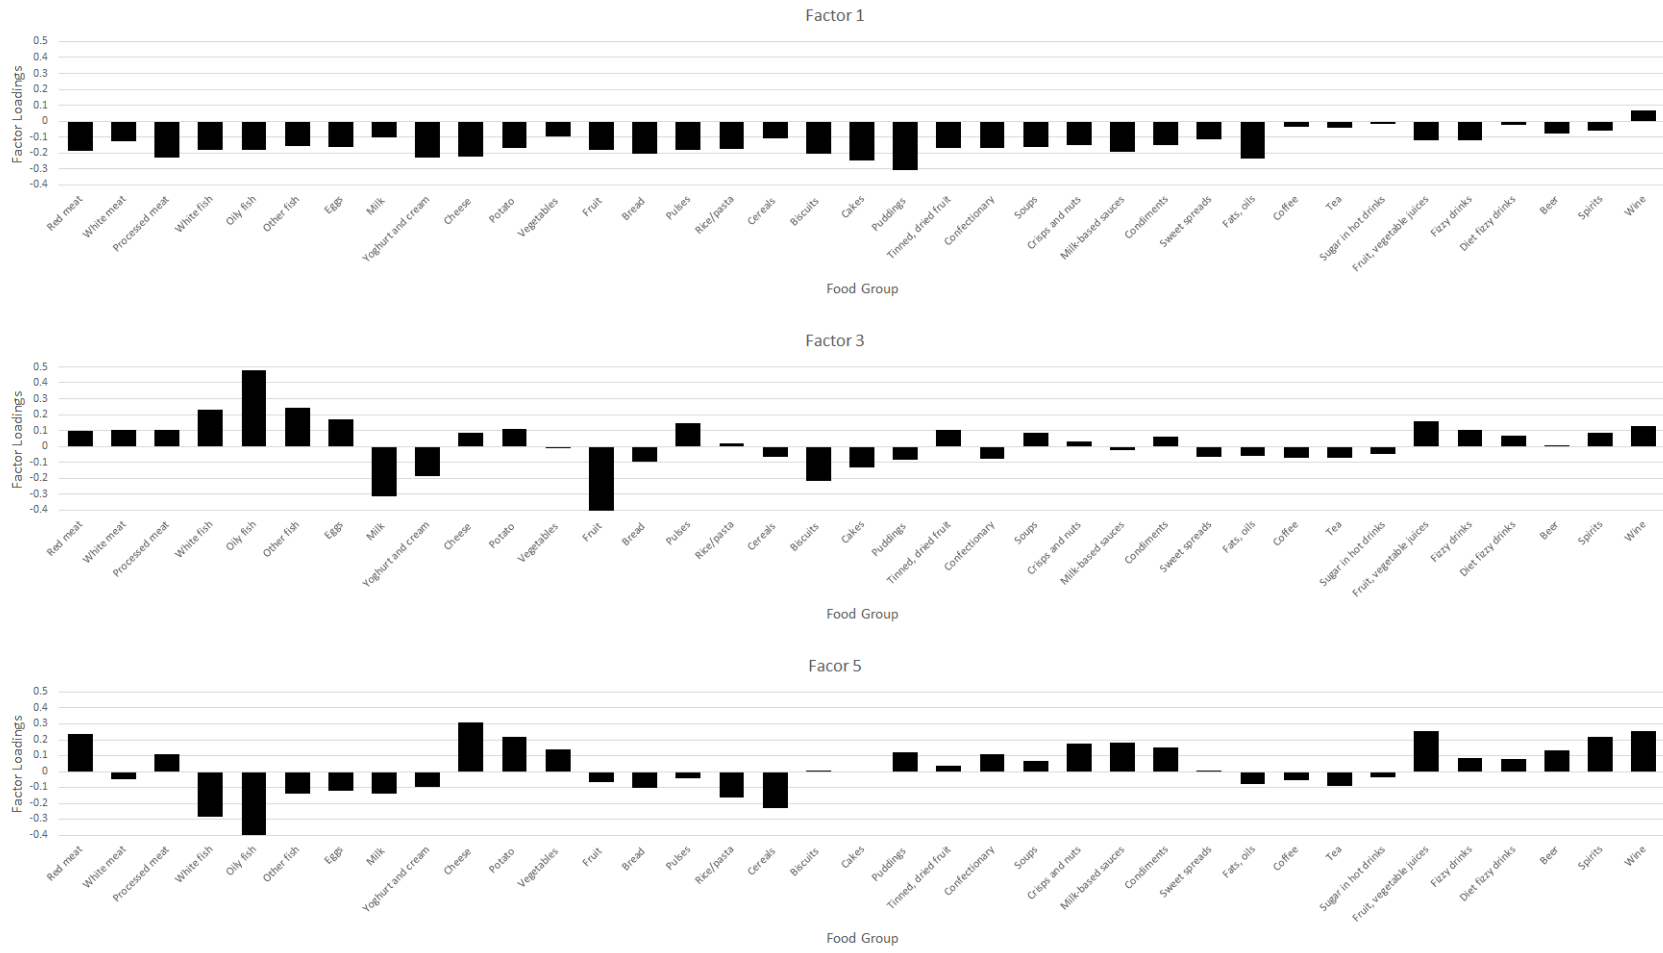

Supplement: MOESM1 [file 13298634]
